# Supplementary material for: Efficiency improvement for perovskite-inspired Cs3Sb2I9 solar cells using P3HT as the hole transport material
Source: Royal Society of Chemistry journal article supplement (doi:10.1039/d1se01150b), 2021-12-01
Supplement: d1se01150b1.pdf [file d1se01150b1.pdf]

## Electronic Supplementary Information (ESI) for

### Efficiency improvement for perovskite-inspired $\text{Cs}_3\text{Sb}_2\text{I}_9$ solar cells using P3HT as the hole transport material

Arto Hiltunen,<sup>\*a‡</sup> Noora Lamminen,<sup>a‡</sup> Henri Salonen,<sup>a</sup> Maning Liu<sup>a</sup> and Paola Vivo<sup>\*a</sup>

Hybrid Solar Cells, Faculty of Engineering and Natural Sciences, Tampere University, P.O. Box 541, FI-33014 Tampere, Finland

\*paola.vivo@tuni.fi

‡These authors contributed equally to this work.

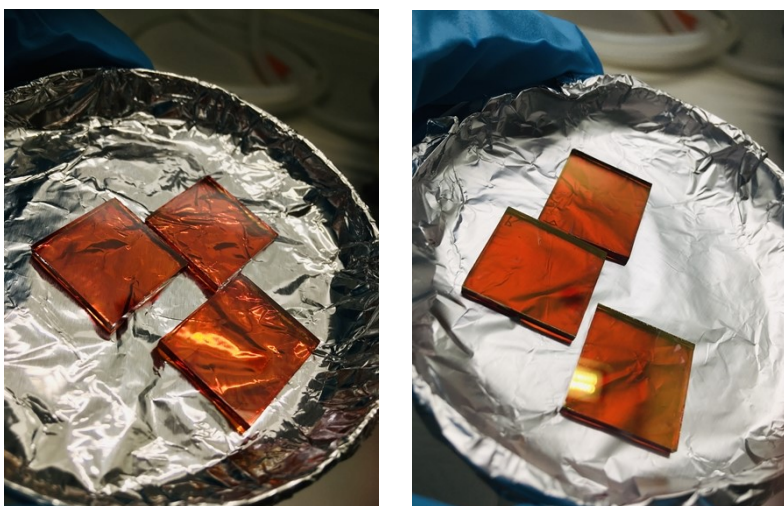

**Figure S1.** Photographs of the films of  $\text{Cs}_3\text{Sb}_2\text{I}_9$  (left). On the right, films with P3HT coating atop  $\text{Cs}_3\text{Sb}_2\text{I}_9$ .

**Table S1.** Comparison of the photovoltaic parameters in this work with those of the closest state-of-the-art solar cell structures.

|                                                                                         | PCE (%) | FF (%) | $J_{sc}$ (mA/cm <sup>2</sup> ) | $V_{oc}$ (V) |
|-----------------------------------------------------------------------------------------|---------|--------|--------------------------------|--------------|
| $\text{Cs}_3\text{Sb}_2\text{I}_9$ with no HTM<br>(this work)                           | 1.19    | 47.70  | 4.70                           | 0.52         |
| $\text{Cs}_3\text{Sb}_2\text{I}_9$ with P3HT as<br>HTM (this work)                      | 2.48    | 54.90  | 5.40                           | 0.80         |
| $\text{Cs}_3\text{Sb}_2\text{I}_9$ with no<br>HTM <sup>[1]*</sup>                       | 1.21    | 55.85  | 3.55                           | 0.61         |
| $\text{Cs}_3\text{Sb}_2\text{Cl}_3\text{I}_6$ with LZ-<br>HTL-1-1 as HTM <sup>[2]</sup> | 2.15    | 56     | 6.46                           | 0.60         |

\*Device area = 0.09 cm<sup>2</sup> (vs. 0.2 cm<sup>2</sup> in this work).

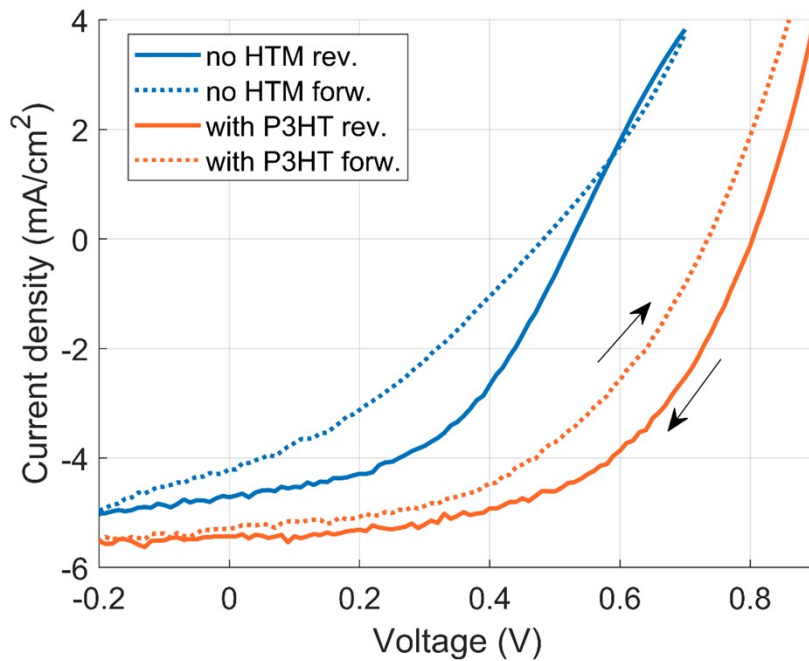

**Figure S2.** Forward and reverse scans for the solar cells. In the forward direction with P3HT the figures of merit are PCE = 1.9 %, FF = 49 %,  $J_{sc}$  = 5.3 mA/cm<sup>2</sup>  $V_{oc}$  = 0.73 V, and without P3HT PCE = 0.68 %, FF = 33 %,  $J_{sc}$  = 4.3 mA/cm<sup>2</sup>, and  $V_{oc}$  = 0.48 V.

**Table S2.** Summary of TRPL data.

| Sample                                                     | <sup>a)</sup> A <sub>1</sub> (%) | $\tau_1$ (ps) | A <sub>2</sub> (%) | $\tau_2$ (ps) |
|------------------------------------------------------------|----------------------------------|---------------|--------------------|---------------|
| glass/Cs <sub>3</sub> Sb <sub>2</sub> I <sub>9</sub>       | 74.1                             | 85.4          | 25.9               | 1025.2        |
| glass/Cs <sub>3</sub> Sb <sub>2</sub> I <sub>9</sub> /P3HT | 83.3                             | 50.9          | 16.7               | 73.5          |

<sup>a)</sup>Contribution factor,  $A_1 + A_2 = 100\%$ .

**Table S3.** Performance dependence on the HCl concentration  $\times \mu\text{l/ml}$  in DMF.

|                     | PCE (%) | FF (%) | $J_{sc}$ (mA/cm <sup>2</sup> ) | $V_{oc}$ (V) |
|---------------------|---------|--------|--------------------------------|--------------|
| 20 $\mu\text{l/ml}$ | 0.03    | 34.00  | 0.30                           | 0.25         |
| 30 $\mu\text{l/ml}$ | 0.74    | 43.14  | 2.90                           | 0.59         |
| 50 $\mu\text{l/ml}$ | 0.90    | 50.90  | 3.98                           | 0.44         |

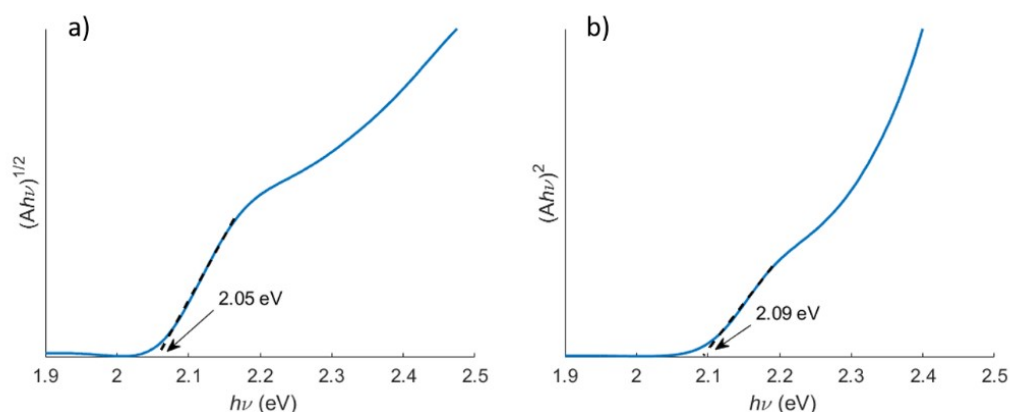

**Figure S3.** a) Indirect Tauc plot; b) direct Tauc plot

**Table S4** Numerical presentation of data presented in Figure 5

| No HTM   | PCE (%) | FF (%) | $J_{sc}$<br>(mA/cm <sup>2</sup> ) | $V_{oc}$ (V) |
|----------|---------|--------|-----------------------------------|--------------|
| Day 1    | 0.46    | 37.36  | 2.46                              | 0.44         |
| st. dev. | 0.35    | 6.77   | 1.33                              | 0.05         |
| Week 1   | 0.53    | 40.39  | 2.63                              | 0.45         |
| st. dev. | 0.39    | 7.51   | 1.25                              | 0.05         |
| Week 2   | 0.47    | 43.47  | 2.36                              | 0.43         |
| st. dev. | 0.30    | 4.60   | 1.13                              | 0.05         |
| Week 4   | 0.30    | 47.74  | 1.50                              | 0.40         |
| st. dev. | 0.22    | 4.42   | 0.94                              | 0.05         |

| With P3HT | PCE (%) | FF (%) | $J_{sc}$<br>(mA/cm <sup>2</sup> ) | $V_{oc}$ (V) |
|-----------|---------|--------|-----------------------------------|--------------|
| Day 1     | 1.17    | 50.03  | 3.82                              | 0.60         |
| st. dev.  | 0.33    | 3.63   | 0.57                              | 0.08         |
| Week 1    | 1.03    | 48.66  | 3.44                              | 0.60         |
| st. dev.  | 0.32    | 2.78   | 0.61                              | 0.08         |
| Week 2    | 0.69    | 48.32  | 2.71                              | 0.52         |
| st. dev.  | 0.18    | 2.85   | 0.52                              | 0.05         |
| Week 4    | 0.40    | 48.99  | 1.85                              | 0.43         |
| st. dev.  | 0.12    | 4.66   | 0.39                              | 0.07         |

## References

1. F. Umar, J. Zhang, Z. Jin, I. Muhammad, X. Yang, H. Deng, K. Jahangeer, Q. Hu, H. Song, J. Tang, F. Umar, J. Zhang, Z. Jin, I. Muhammad, X. Yang, H. Deng, K. Jahangeer, Q. Hu, H. Song, J. Tang, *Adv. Optical Mater.* **2019**, *7*, 1801368.
2. Y. Peng, F. Li, Y. Wang, Y. Li, R. L. Z. Hoye, L. Feng, K. Xia, V. Pecunia, *Appl. Mater. Today* **2020**, *19*, 21.
